# Supplementary material
Source: ML conference proceedings conference paper supplement (https://openreview.net/forum?id=ZHziiyLWSr)
Supplement: supplementary_material [file attachment]

## 1 Qualitative examples

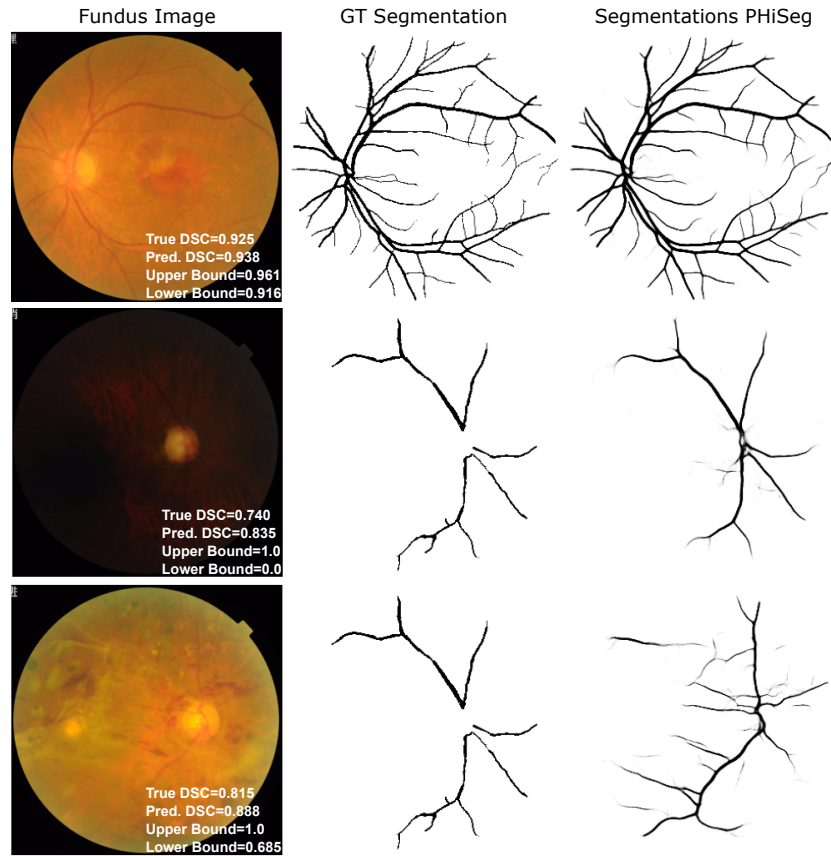

**Fig. 1.** PHiSeg segmentations and performance predictions for three examples. Top: An example with good segmentation performance. Middle: An example with poor image quality and poor segmentation performance. Bottom: An example with good image quality but poor segmentation performance due to visible pathologies stemming from advanced diabetic retinopathy.

## 2 Conditional coverage grouped by quality

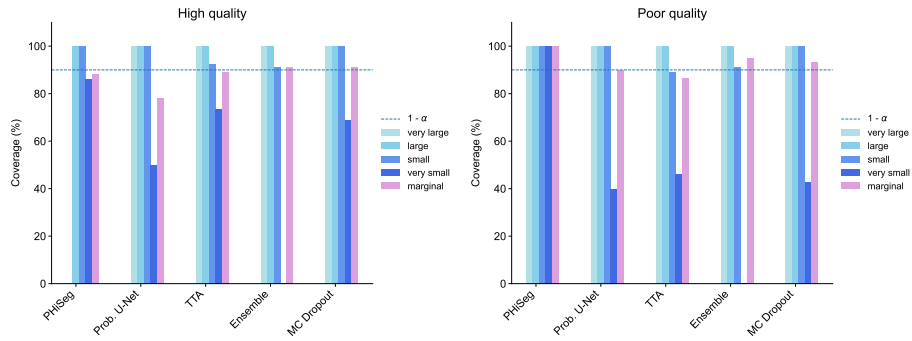

**Fig. 2.** Marginal and conditional coverage for multiple interval sizes: very small (0, 0.1], small (0.1, 2], large (0.2, 5]), very large (0.5, 1]) for high quality images (left) and poor quality images (right).
